# Supplementary material for: Evaluation of the efficacy of CT/MR-Ultrasound Fusion Imaging in Ablation of Hepatocellular Carcinoma
Source: Research Square preprint supplement (doi:10.21203/rs.3.rs-6909462/v1), 2025-09-30
Supplement: Supplementary file 1 [file 0c77959764b4bd9e1353ba20.pdf]

## 伦理审查批件

### （临床医学研究）

批件号：中大附三医伦 II2025-152-01

|                                                                                                                                                                                                                                                                                                                                                                                                                                                                                                                                                                                                                                                      |                                                                                                                                                                                       |
|------------------------------------------------------------------------------------------------------------------------------------------------------------------------------------------------------------------------------------------------------------------------------------------------------------------------------------------------------------------------------------------------------------------------------------------------------------------------------------------------------------------------------------------------------------------------------------------------------------------------------------------------------|---------------------------------------------------------------------------------------------------------------------------------------------------------------------------------------|
| 项目名称                                                                                                                                                                                                                                                                                                                                                                                                                                                                                                                                                                                                                                                 | 融合成像在肝癌消融中的应用：一项横断面研究                                                                                                                                                                 |
| 本院承担科室                                                                                                                                                                                                                                                                                                                                                                                                                                                                                                                                                                                                                                               | 超声科                                                                                                                                                                                   |
| 本院项目负责人                                                                                                                                                                                                                                                                                                                                                                                                                                                                                                                                                                                                                                              | 李凯                                                                                                                                                                                    |
| 项目来源                                                                                                                                                                                                                                                                                                                                                                                                                                                                                                                                                                                                                                                 | 中山大学附属第三医院                                                                                                                                                                            |
| 经费来源                                                                                                                                                                                                                                                                                                                                                                                                                                                                                                                                                                                                                                                 | 研究者自筹项目                                                                                                                                                                               |
| 审查信息                                                                                                                                                                                                                                                                                                                                                                                                                                                                                                                                                                                                                                                 | 初始审查申请<br>快速审查 日期：2025-04-23 地点：无                                                                                                                                                     |
| 审查类型                                                                                                                                                                                                                                                                                                                                                                                                                                                                                                                                                                                                                                                 | 初始审查                                                                                                                                                                                  |
| 表决情况                                                                                                                                                                                                                                                                                                                                                                                                                                                                                                                                                                                                                                                 | 评审委员 2 名，同意 2 人。                                                                                                                                                                      |
| 审查文件                                                                                                                                                                                                                                                                                                                                                                                                                                                                                                                                                                                                                                                 | <p>批准文件</p> <p>1. 研究项目方案（版本号：1.0，版本日期：2025.1.1）</p> <p>审阅文件：</p> <p>1. 伦理审查申请表签字扫描版</p> <p>2. 研究团队名单</p> <p>3. 研究项目负责人专业履历</p> <p>4. 立项证明文件（例：立项批文/科学性审查批件/合同书）</p> <p>5. 伦理审查申请表</p> |
| <p><b>审查意见：</b></p> <p>根据国家卫生健康委、教育部、科技部、国家中医药局《涉及人的生命科学和医学研究伦理审查办法》（2023 年），国家卫生计生委第 11 号令《涉及人的生物医学研究伦理审查办法》（2016 年），国家药品监督管理局《药物临床试验质量管理规范（2020 年）》，《医疗器械临床试验规定》（2022 年），《药物临床试验伦理审查工作指导原则》（2010 年），（2007 年），国家卫生计生委、国家食品药品监督管理总局《干细胞临床研究管理办法（试行）》（2015 年）等法规、政策与指南的规定，以及 WMA《赫尔辛基宣言》、ICH-GCP 和 CIOMS《人体生物医学研究国际道德指南》的伦理原则，经本伦理委员会审查，意见如下：</p> <p style="text-align: center;"><b>同意在本中心按所同意的临床研究方案、知情同意书开展本项研究。</b></p> <p>建议：</p> <ul style="list-style-type: none"> <li>● 请遵循 ICH-GCP 及中国 GCP 原则、遵循伦理委员会批准的方案开展临床研究，保护受试者的健康与权利。</li> <li>● 属于国际合作项目，请按照《人类遗传资源管理暂行办法》及《科技部关于进一步加强人类遗传资源管理工作的通知》要求，须在取得人类遗传资源采集、收集、买卖、出口、出境审批书后方可实施临床</li> </ul> |                                                                                                                                                                                       |

研究，并将审批书报备伦理委员会。

- 研究过程中若变更项目负责人，对临床研究方案、知情同意书、招募材料等的任何修改，请申请人提交修正案审查申请。

- 发生严重不良反应或严重不良事件，请申请人及时提交严重不良反应或严重不良事件报告。

- 请按照伦理委员会规定的年度/定期跟踪审查频率，申办者截止日期前 1 个月提交研究进展报告；申办者应当向组长单位伦理委员会提交各中心研究进展的汇总报告；当出现任何可能显著影响研究进行、或增加受试者危险的情况时，请申办者及时向伦理委员会提交书面报告。

- 研究纳入了不符合纳入标准或符合排除标准的受试者，符合中止研究规定而未让受试者退出研究，给予错误治疗或剂量，给予方案禁止的合并用药等没有遵从方案开展研究的情况；或可能对受试者的权益/健康以及研究的科学性造成不良影响等违背 GCP 原则的情况，请申办者/监察员/研究者提交违背方案报告。

- 申办者暂停或提前终止临床研究，请及时提交暂停/终止研究报告。

- 完成临床研究，请申办者提交研究完成报告。

- 递交年度/定期进展报告可延长批件有效期。在有效期内未实施开展的，需重新提交伦理委员会审查后再开展研究。

本伦理委员会的职责、人员组成和工作程序符合 ICH-GCP、中国 GCP 原则及国家法律法规及规章等相关文件。

年度/定期跟踪审查频率：12 个月

下次跟踪审查截止日期：2026 年 04 月 22 日

批件有效期：2025 年 04 月 23 日——2026 年 04 月 22 日

主任/副主任签字：

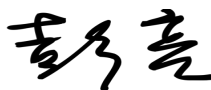

日期：2025 年 04 月 23 日

伦理委员会（盖章）：中山大学附属第三医院医学伦理委员会
