# Supplementary material for: Evaluation of the efficacy of CT/MR-Ultrasound Fusion Imaging in Ablation of Hepatocellular Carcinoma
Source: Research Square preprint supplement (doi:10.21203/rs.3.rs-6909462/v1), 2025-09-30
Supplement: Supplementary file 1 [file 257aacfda9af965f37b54248.xlsx]

## Sheet: Sheet1
登记号	姓名	性别	年龄	手术时间	诊断（肝癌0、肝转移瘤1其他3	病理（0无、1有）	合并症（0无、高血压1、糖尿病2、心脏病3、肾病4、其他5	住院天数	肝硬化（0无，1有）	门脉高压（1有0无）	肝性脑病（0否、1是）	腹水（0无、1有）	肿瘤位置	肿瘤最大径（mm）	肿瘤数量(个数)	联合微波（0无1有）	针数（单针0、双针1）	术后并发症 0无 1有	并发症类型	复发 0是1否	复发类型（LTP0、肝内1、肝外2	复发日期	最终随访日期	肝病类型（乙肝0，丙肝1、无2）	AFP	AST谷草转氨酶	ALT谷丙转氨酶	ALB (g/L)白蛋白	TB (g/L)总胆红素	PT（s） 凝血酶原时间	白细胞	血红蛋白	PLT (10^9) 血小板
1002183356	林水德	男	60岁	2024-12-04	1	1	乙状结肠癌		0	0	0	0	S6（1个）、S5/6（2个）、S7/6（3个）	35	6		0	0		0			术后未复查	0	10.1	61	86	42.8	15.1	12.7	6.96	139	171
0002564215	胡国樑	男	74岁	2024-11-30	0	高-中分化肝细胞癌	0	6	0	0	0	0	S4/5	13	1	0	1	0		0			术后未复查	0	1.95	25	19	37.5	8.2	13.0	5.52	144	185
1002316022	成庆荣	男	69岁	2024-11-27	0	中分化肝细胞肝癌	0	14	1	0	0	0	S6	25	1	0	1	0		0			术后未复查	0	3.13	25	29	37.7	10.9	13.3	4.45	142	158
1002303406	黄伟宏	男	66岁	2024-11-26	0	高-中分化肝细胞癌	3	13	1	1	0	0	S7、S8（第一个）、S8（第二个）、S6	20	4	0	1	0		0			术后未复查	0	20.4	52	83	45.7	19.7	13.8	6.07	167	171
0001994504	蔡阳娇	女	33岁	2024-11-26	1	未见转移癌	乳腺癌	8	0	0	0	0	S2（第一个）、S5、S2（第二个）	15	3	0	0	0		0			术后未复查	2	2.92	18	18	40.7	11.4	12.6	6.68	131	275
1002326396	方炳希	男	68岁	2024-11-25	0	高分化肝细胞癌	1、2	11	1	1	0	0	S8	18	1	0	0	0		0			术后未复查	0	66.99	48	124	35.3	15.27	14.7	5.76	142	160
1002326549	黄柳颜	女	75岁	2024-11-22	1	肠癌转移	乙状结肠癌、1	11	0	0	0	0	S4/8	31	1	1	0	0		0			术后未复查	2	3.04	23	17	33.1	4.5	13.7	4.49	109	181
0002677004	单关甜	男	64岁	2024-11-22	0	0	0	13	1	1		0	S5	26	1	1	0	0		0			术后未复查	0	5.16	29	30	42.9	12.8	14.1	6.16	108	255
0003228472	万发	男	61岁	2024-11-22	0	中分化肝细胞癌	2	15	1	1		0	S7、S8（第一个）、S8（第二个）、S6	37	1	1	0	0		0			术后未复查	0	3.48	29	22	36.2	46.1	17.4	3.42	155	38
1002312132	吴青	女	61岁	2024-11-21	0	高分化肝细胞癌	布-加综合征[budd-chiari综合征]	11	1	1		0	S6	39	1	0	1	0		0			术后未复查	2	2.61	36	13	32.6	17.71	14.7	4.52	111	142
1002312675	陈少平	男	46岁	2024-11-20	0	不能除外血管源性肿瘤（上皮样血管内皮瘤可能）	0	5	0	0		0	S5	16	1	0	0	0		0			术后未复查	0	2.86	23	23	45.2	5.6	13.1	7.02	142	215
1001894050	曾苏凤	女	63岁	2024-11-19	0	0	1	4	0	0		0	S5/6	12	1	0	0	0		0			术后未复查	0	3.32	20	22	40.2	5.1	13.1	6.16	139	293
0002648341	黄建锋	男	47岁	2024-11-18	0	高分化肝细胞癌	0	7	0	0		0	S8	29	1	1	0	0		0			术后未复查	0	2.67	16	25	40.7	5.0	12.3	7.84	149	220
1001674451	苏桂彪	男	57岁	2024-11-18	0	肝细胞肝癌	0	14	1	1		0	S2、S3	12	2	0	0	0		0			术后未复查	0	30.6	46	41	38.3	15.99	12.9	4.36	136	127
1002294797	李亚旺	男	62岁	2024-11-15	0	0	2	14	1	1		0	S7（第一个）、S7（第二个）、S5/8（1个）、S4/8（2个）	10mm、10mm、13mm、20mm、25mm。	5	1	0	1	上呼吸道感染	0			术后未复查	2	118	27	19	31.9	4.3	14.7	4.26	132	111
0004297494	许祖兰	女	53岁	2024-11-15	0	中分化肝细胞癌	0	5	1	0		0	S8	15	1	0	0	0		0			术后未复查	1	41.31	24	27	50.2	18.8	13.4	5.54	154	341
1002254348	林汉忠	男	67岁	2024-11-14	0	0	0	19	1	1		0	S7	15	1	0	0	0		0			术后未复查	0	1.61	24	17	34.4	11.9	13.1	2.46	117	96
0004329266	梁润森	男	42岁	2024-11-14	0	中分化肝细胞癌	0	6	1	1		0	S3	13	1	0	0	0		0			术后未复查	0	79.21	27	12	51.4	7.7	13.1	6.03	147	174
1000685893	郑秋明	男	63岁	2024-11-13	0	中分化肝细胞癌	0	5	1	1		0	S3	30	1	1	0	0		0			术后未复查	0	3.92	31	23	34	16.1	16.1	3.51	128	345
1002305060	殷伟华	男	52岁	2024-11-13	0	肝细胞癌	0	10	0	0		0	S6/7	36	1	1	0	0		0			术后未复查	0	8.71	44	67	48.4	13.5	13.7	6.86	157	346
1000563329	彭石灿	男	65岁	2024-11-11	0	中分化肝细胞癌	0	6	1	1		0	S7	16	1	0	0	0		0			术后未复查	0	2.68	26	23	37	12.2	14.2	4.55	152	89
0002967506	何容枝	男	56岁	2024-11-08	0	0	0	15	1	1		0	S6、S7（靠下腔）、S7（靠膈顶）、S5、S8	10mm、10mm、10mm、10mm、20mm。	5	1	0	1	胸腔出血	0			术后未复查	1	19.31	37	24	32.2	35.1	15.7	2.35	146	42
1000513139	叶佐港	男	30岁	2024-11-06	0	0	0	5	0	0		0	S4	14	1	0	0	0		0			2024.12.3	0	3.32	17	29	44.3	20.6	13.3	7.05	158	151
1001438551	吴开林	男	69岁	2024-11-06	0	混合性肝细胞-胆管细胞癌	3	7	1	1		0	S7、S5/6	8、15	2	0	1	0		0			术后未复查	0	27.12	23	28	41.1	11.4	14.7	4.86	138	159
1001447935	黄亚群	女	53岁	2024-11-04	0	0	0	11	1	1		0	S1	16	1	0	0	0		0			术后未复查	0	2.94	31	17	35.8	7.4	14.2	4.26	111	301
0003450935	吴翠英	女	68岁	2024-11-04	0	高分化肝细胞癌	1、乳腺癌	13	1	1		0	S7	23	1	0	0	0		0			术后未复查	2	4.08	37	16	34.2	60	18.9	3.97	125	65
1001615889	姚亮光	男	61岁	2024-11-04	0	中分化肝细胞癌	0	4	0	0		0	S5/6、S5/6、S3	5mm、10mm、6mm	3	0	0	0		0			2024.12.4	0	5.73	19	30	48.1	17.2	13.5	7.03	146	192
1002058212	蔡红儿	女	56岁	2024-11-01	0	中分化肝细胞癌	子宫内膜癌	8	0	0		0	S5、S8、S8（包膜下）	15mm、10mm、20mm	3	1	0	0		0			术后未复查	0	4.06	26	25	33.2	7.9	14.2	3.77	76	278
1002259699	谭社针	男	69岁	2024-10-31	0	0	1	6	1	1		0	S7、S1/5	12、14	2	0	0	0		0			术后未复查	0	2.04	24	22	38.3	8	14.6	5.26	146	133
0002772430	李猷新	男	47岁	2024-10-31	0	中分化肝细胞癌	0	8	1	1		0	S6	22	1	0	1	0		0			2024.12.2	0	19.5	21	21	47.3	19.3	14.7	5.84	157	185
1001027354	肖英致	男	76岁	2024-10-30	1	0	2、肠癌	12	0	0		0	S6	17	1	0	0	0		0			术后未复查	2	3.54	15	16	39.7	28.5	13	5.64	147	357
0000764342	向奉清	男	62岁	2024-10-30	1	0	1、肠癌、肾上腺癌、肺癌	10	0	0		0	S7	15	1	0	0	0		0			2024.11.22	2	3.53	34	26	32.9	5.8	14	4.57	108	169
1001442044	杨刘生	男	76岁	2024-10-30	0	中分化肝细胞癌	1、2	14	1	1		0	S6/7、S8包膜、S4/8肿块	23mm、10mm、25mm	3	1	0	1	心动过速	0			术后未复查	0	938	66	50	30.7	29.4	15.9	3.14	104	58
1001198479	袁东阳	男	70岁	2024-10-29	0	中分化肝细胞癌	1	8	1	1		0	S5	15	1	0	0	0		0			术后未复查	0	1.79	21	20	41.8	5.1	13.4	6.61	124	196
0003539846	陈伟坚	男	51岁	2024-10-26	0	0	1、2	5	1	1			S4	21	1	0	0	0		0			术后未复查	0	1.14	37	39	33.7	10.89	15	6.25	118	105
1001833474	邱明湘	男	84岁	2024-10-25	1	肠腺癌肝转移	肠癌	7	0	0		0	S5	10	1	0	0	0		0			术后未复查	2	2.79	21	19	32.3	6.1	13.9	2.69	124	104
1002259491	林爱涕	女	57岁	2024-10-25	0	中分化肝细胞癌	2、自发性腹膜炎	17	1	0		0	S2/3、S3、S8	10、20、22	3	1	0	0		0			2024.12.3	0	12.6	51	34	34.1	33	18.8	8.09	103	115
0002651840	梁伯勋	男	60岁	2024-10-25	0	中分化细胞癌	0	12	1	1		0	S7、S4	13、14	2	0	0	0		0			术后未复查	0	337	34	42	39	10.3	15.1	5.78	155	134
0004108021	李忠贤	男	28岁	2024-10-25	肝局灶性结节状增生（FNH）	肝局灶性结节状增生（FNH）	0	9	0	0		0	S7、S4	23	1	0	0	0		0			术后未复查	2	1.36	16	24	47.9	13	13.2	6.98	162	199
1002147149	农秀娟	女	54岁	2024-10-23	1	未见确切肿瘤	回肠间质瘤	5	0	0		0	S4/8、S5/6	6、31	2	1	0	0		0			2024.11.28	2	1.35	41	79	27.5	9.1	12.9	4.63	125	323
1002275709	卢燕玉	女	59岁	2024-10-21	肝局灶性结节状增生（FNH）	肝局灶性结节状增生（FNH）	1	5	0	0		0	S6/7	20	1	0	0	0		0			术后未复查	2	2.39	28	26	46.2	9.6	12	6.61	128	282
0004533852	袁建文	男	45岁	2024-10-21	0	0	2	14	1	1		0	S7/8	15	1	0	0	0		0			术后未复查	0	2.18	32	30	34.8	24.9	15.9	8.09	116	41
1002192364	盘荣汉	男	49岁	2024-10-18	0	高-中分化肝细胞癌	0	6	1	1		0	S5/6	18	1	0	0	0		0			2024.12.3	0	6.32	39	41	34.7	31.6	16.6	5.03	101	73
0003282152	黄炳添	男	71岁	2024-10-18	0	0	1	15	1	0		0	S2/3	45	1	1	0	1	皮下血肿	0			2024.11.29	0	246.8	18	18	43.5	17.9	14.6	6.65	163	100
0003826618	章映洪	女	58岁	2024-10-16	0	中分化肝细胞癌	甲亢	13	1	1		0	S4/8、S5/6	35	1	1	0	0		0			2024.11.15	0	36.6	36	20	34.2	25.1	15.6	8.59	111	59
1002267620	朱达战	男	73岁	2024-10-16	0	中分化肝细胞癌	1、2	11	1	1		0	S6、S8	15、40	2	1	0	0		0			术后未复查	0	83.7	37	29	34.5	7.3	13.5	6.60	128	214
1001587327	杨计通	男	60岁	2024-10-16	0	中分化肝细胞癌	0	12	1	1		0	S8	19	1	0	0	0		0			2024.11.11	0	141.5	26	24	37.7	12.9	14.2	3.07	138	124
1002108087	李开河	男	47岁	2024-10-16	0	0	0	7	1	1		0	S8	10	1	0	0	0		0			2024.12.4	0	5.51	45	56	41.8	29.15	15.4	2.32	155	82
1001606084	谭偏	男	52岁	2024-10-16	1	0	十二指肠恶性肿瘤	9	0	0		0	S4	12	1	0	0	0		0			2024.11.18	2	6.26	28	27	39.6	9.6	14.3	4.72	130	155
0000692027	梁汝文	男	58岁	2024-10-12	0	肝细胞性肝癌，倾向高-中分化	0	10	1	0		0	S3、S7、S5	38、16、5	3	1	0	0		0			2024.11.24	0	165.3	22	30	36.1	14.5	15.2	13.8	143	130
1001880702	卢欣连	男	73岁	2024-10-11	0	0	0	17	0	0		0	S6/7、S5、S8、S6	50	4	1	0	0		0			术后未复查	0	5.96	28	17	28.7	15	15.1	2.8	119	127
0001495232	谭兆波	男	59岁	2024-10-11	0	0	0	29	1	1		0	S2、S4	14、7	2	0	0	1	术后腹腔慢性渗血	0			术后未复查	0	3.07	34	30	35.7	36.3	17.6	2.82	151	45
0003585488	王湘莲	女	62岁	2024-10-08	1	神经内分泌肿瘤转移	胰腺肿瘤	5	0	0		0	S7	10	1	0	0	0		0			术后未复查	2	2.18	25	25	45.1	10.3	12.7	4.72	130	359
0003855874	丘亚锡	男	53岁	2024-09-30	0	肝细胞癌	0	10	1	1		0	S5/6	7	1	0	0	0		0			2024.12.5	0	97.2	28	27	40.7	14.3	14.4	2.34	136	85
0004413152	刘伟佳	男	32岁	2024-09-30	0	慢性炎性肝损伤伴局部纤维化	0	6	1	1		0	S7	12	1	0	0	0		0			2024.11.13	0	2.61	30	33	41.3	9.6	16.4	6.11	119	278
0004725271	陈建明	男	59岁	2024-09-30	0	0	0	7	0	0		0	S5/8	18	1	0	0	0		0			术后未复查	2	3.14	30	30	41.1	10	12.4	5.96	156	162
1001687899	何防修	男	61岁	2024-09-29	0	0	0	11	1	1		0	S6/7、S3	27、8	2	1	0	0		0			术后未复查	0	12.56	44	65	30	15.4	14.3	2.42	131	69
1002214917	王亚婷	女	35岁	2024-09-29	肝脏局灶性结节状增生（FNH）	肝脏局灶性结节状增生（FNH）	0	6	0	0		0	S8	19	1	1	0	0		0			术后未复查	2	2.15	24	39	41	7.5	13.5	5.27	131	221
1001469347	薛忠标	男	66岁	2024-09-27	0	中分化肝细胞肝癌	0	11	1	1		0	S3、S7、S5	26	1	0	0	0		0			2024.11.14	0	1.92	28	21	38.6	13.5	15.1	2.87	116	57
1002153243	周建林	男	50岁	2024-09-27	0	肿瘤治疗后改变，未见确切肿瘤证据	0	10	1	0		0	S8	33	1	1	0	0		0			2024.11.22	0	2.47	20	35	37.9	9.7	13.8	4.39	164	123
0002689486	刘祥源	男	72岁	2024-09-27	0	中分化肝细胞癌	1	6	0	0		0	S6	19	1	0	1	0		0			术后未复查	0	3.65	15	25	38.5	8.6	14	7.19	137	195
0004571845	梁文飞	男	58岁	2024-09-26	0	0	0	7	1	0		0	S6	14	1	0	0	0		0			2024.12.5	0	1.73	23	33	44.1	11.3	12.8	4.63	165	171
1002226149	邢洪波	男	19岁	2024-09-24	0	中分化肝细胞癌	0	16	1	0		0	S5/8	30	1	1	0	1	发烧	0			2024.10.29	0	8.05	30	47	39.7	10.3	14.7	6.27	150	225
1001751680	徐景宽	男	37岁	2024-09-24	0	0	0	2	0	0		0	S5/6	5	1	0	0	0		0			2024.12.5	0	34.4	20	25	53.6	10.4	13.5	2.75	162	169
0002206389	杨伟安	男	58岁	2024-09-24	0	0	2、高血脂	11	0	0		0	S5	13	1	0	0	0		0			2024.11.18	0	1.87	27	15	35.4	17.3	14.5	3.12	98	135
0002471938	刘智祥	男	42岁	2024-09-21	0	0	0	3	1	1		0	S6	19	1	0	0	0		0			术后未复查	0	8.17	51	52	48.1	13.1	12.7	4.56	154	138
1000090578	廖剑锋	男	37岁	2024-09-21	0	0	2	10	1	1		0	S7	12	1	0	0	0		0			2024.11.18	0	8.63	48	54	38.8	16.4	12.7	6.88	160	185
1001990116	江元朝	男	69岁	2024-09-19	0	结节性肝硬化伴局灶细胞低级别异型增生及灶性坏死	1	12	1	1		0	S4	25	1	1	0	0		1	1（S4:13*11）	2024.11.4	2024.11.7	0	5.54	37	36	41	16.3	12.7	6.47	173	115
0000028913	左力	男	59岁	2024-09-19	0	中分化肝细胞癌	1	4	1	1		0	S2	10	1	0	0	0		0			2024.10.31	0	21.2	19	26	47.4	15.1	13.5	7.05	150	184
0003151771	蔡宏明	男	61岁	2024-09-19	0	0	1	6	1	0		0	S5、S7	19、19	2	0	0	0		1	1（S7:）	2024.11.14	2024.11.14	0	1.66	31	37	37	10.3	13.9	3.25	92	61
1001011471	骆林珍	女	62岁	2024-09-13	0	中分化肝细胞癌	甲状腺切除	19	1	0		0	S4	18	1	0	0	0		0			2024.10.28	0	675.4	49	47	36.6	6.1	13.4	4.48	110	108
1002082975	刘爱新	男	74岁	2024-09-13	1	肠腺癌转移	1、中风、肠癌	17	0	0		0	S5/6/7/8	20	1	1	0	0		0			2024.11.18	2	1.78	15	14	31.6	3.9	13.3	6.36	108	230
1002093277	黎良聪	男	35岁	2024-09-13	肝局灶性结节状增生（FNH）	肝局灶性结节状增生（FNH）	0	10	0	0		0	S3、S3、S2/4、S8	10mm、10mm、15mm、20mm	4	0	0	0		0			2024.11.8	0	2.64	17	15	39.9	13.3	13.4	4.65	123	223
0004055783	文晚妹	女	69岁	2024-09-11	0	肝细胞癌，倾向中分化	0	7	1	1			S8	28	1	1	0	0		0			2024.10.14	0	124.6	36	22	39.4	15.2	13.4	5.16	134	81
1001707548	谢能华	女	71岁	2024-09-11	肝细胞腺瘤与异型增生结节相鉴别	肝细胞腺瘤与异型增生结节相鉴别	1、2	10	1	1		0	S4/8	20	1	0	0	0		0			术后未复查	0	6.27	25	33	35.5	16.4	13.9	4.20	130	114
1002210378	谢炳权	男	69岁	2024-09-06	1	肠腺癌肝转移	肠癌	10	0	0		0	S8、S5、S7、S8、S5/8	20mm、15mm、10mm、10mm、10mm。	5	0	1	0		0			2024.11.1	0	2.13	27	26	41.8	7.5	12.2	6.23	152	206
0001543631	赖银鹰	男	72岁	2024-09-04	0	0	3	8	1	0		0	S7	24	1	0	0	0		0			2024.11.13	0	48.2	18	20	31.2	16.2	14.7	7.18	117	194
1001325439	李锡澄	男	77岁	2024-09-02	1	胸腺鳞状细胞癌转移	胸腺鳞状细胞癌	3	0	0		0	S2/4、S3/4	15	2	0	0	0		1	1（S2/4）	2024.10.25	2024.10.25	2	3.69	17	14	36	7.1	13.3	5.9	122	194
1001950760	钟义华	男	52岁	2024-08-30	0	中分化肝细胞癌	0	8	1	1		0	S4/8	24	1	0	0	0		0			2024.10.28	1	3.68	24	18	32.6	64.9	16.2	4.43	118	53
0004767684	李金菠	男	42岁	2024-08-30	0	0	0	6	1	1		0	S3	20	1	0	0	0		0			2024.9.23	0	11.89	28	28	27	18.2	15.3	2.19	122	56
1001195135	黄灿彩	男	60岁	2024-08-30	0	0	0	6	0	0		0	S8、S5、S7、S8、S5/8	25	1	0	0	0		0			2024.10.11	2	4.44	19	29	40.8	7.4	11.8	6.79	149	163
1001676660	萧任权	男	56岁	2024-08-30	肾上腺皮质腺瘤	肾上腺皮质腺瘤	1、低血钾	9	0	0		0	右侧肾上腺	14	1	0	0	0		0			术后未复查	2	无					13.2	6.2	147	175
0003296485	张国林	男	74岁	2024-08-27	0	0	0	3	0	0		0	S2/4、S3/4	15	1	0	1	0		0			2024.12.2	0	27.4	23	22	43.6	17.4	13.7	2.98	138	97
0003398798	易龙	男	60岁	2024-08-27	0	0	1	9	1	1		0	S7	18	1	0	1	0		0			2024.11.12	0	2.37	27	30	45.2	29.4	14.5	3.36	157	87
1002190162	冯添	女	34岁	2024-08-27	0	中分化肝细胞癌	0	15	1	1		0	S8	24	1	1	0	0		0			2024.10.30	0	65.44	37	39	47.3	8.2	13.3	3.72	129	130
1002202733	林秋萍	女	59岁	2024-08-27	1	肿瘤转移	肠癌、甲状腺切除	15	0	0		0	S6/7（2个）、S5/6（1个）、S8（1个）、S5（1个）	6	5	0	0	0		0			2024.10.11	2	3.67	13	13	39.4	12.6	12.9	4.92	117	255
1001870737	张寿珍	男	66岁	2024-08-26	0	慢性乙型肝炎合并结节性肝硬化	1、2	16	1	1			S8	30	1	1	0	0		0			2024.12.5	0	5.99	33	18	37.9	8.31	13.7	4.05	152	94
0003842552	梁国友	男	75岁	2024-08-24	0	0	1、2	5	1	0		0	S2	17	1	1	0	0		0			2024.11.17	0	1.53	22	18	39.7	9.5	13	7.43	151	157
1001475698	冯坚强	男	58岁	2024-08-23	0	高分化肝细胞癌	2	14	1	1		0	S8（2个）	26、15	2	0	0	0		0			2024.9.26	0	4.36	37	43	40.4	17.3	14.2	5.29	150	126
0000001511	陈润成	男	49岁	2024-08-23	0	0	0	10	1	1		0	S7	11	1	0	0	0		0			2024.10.26	0	6.05	49	45	38.1	44.3	14.8	3.37	147	56
0003614883	焦亚秀	男	55岁	2024-08-23	0	中分化肝细胞癌	0	8	1	1		0	S5/6	12	1	0	0	0		0			术后未复查	0	3.7	18	31	43.3	20.2	13.6	3.69	149	79
0003575257	叶胜昌	男	66岁	2024-08-23	0	中分化肝细胞癌	2	14	1	1		0	S3	16	1	0	0	0		0			2024.11.22	0	1.07	18	21	44.7	5.43	12.5	9.03	150	172
1001972463	郑君旺	男	52岁	2024-08-22	0	肝肿瘤	2、肺结核	9	1	1		0	S4/8、S8	10、15	2	0	0	0		0			2024.10.10	0	2.96	42	34	37.4	17.3	13.3	6.91	155	98
1001887108	黎常文	男	52岁	2024-08-16	0	0	0	8	1	0		0	S5/6	27	1	0	0	0		1	1（S6、S4/8）	2024.9.11	2024.9.20	0	129.1	35	48	34.3	18.3	13.4	5.27	152	187
0001676987	伍英舜	男	62岁	2024-08-14	肾上腺皮质腺瘤	肾上腺皮质腺瘤	1、低血钾	15	0	0		0	右侧肾上腺	14	1	0	0	0		0			术后未复查	2		17	12	46.6	7.7	11.9	5.76	135	175
1001776275	黄建南	男	55岁	2024-08-09	0	低分化肝细胞性肝癌	1、2	5	1	0		0	S8	22	1	1	0	0		0			2024.9.12	0	628.1	67	44	32.2	7.3	14.3	4.96	145	131
1001986500	谢保生	男	59岁	2024-08-06	0	0	0	9	0	0		0	S2	13	1	0	0	0		0			2024.9.23	0	91.45	47	52	44.1	10.5	13.3	4.66	143	109
1001541309	周楚凯	男	72岁	2024-08-02	0	0	1、2	14	1	1		0	S7、S2/3	10、21	2	0	0	0		0			术后未复查	0	2.48	21	13	36.4	13.9	14.6	5.8	125	57
0002413576	关泽垣	男	64岁	2024-08-01	0	中分化肝细胞癌	0	5	1	1		0	S5/6	12	1	0	0	0		0			2024.11.21	0	7.97	31	20	40.8	20.3	17	6.87	149	74
1002083120	陈俊发	男	56岁	2024-07-31	0	中分化肝细胞癌	2	24	1	1		0	S2/4、S6、S8	20mm、15mm、23mm	3	1	0	1	发烧	0			2024.9.6	0	14.11	62	52	29.1	25.8	15.1	6.77	110	83
1000112145	罗智武	男	51岁	2024-07-31	0	中分化肝细胞癌	0	18	1	1		0	S6/7	36	1	1	0	0		0			2024.9.2	0	2.16	42	40	41.4	10.6	13.8	3.6	111	309
0001106564	林惠忠	男	48岁	2024-07-30	0	中分化肝细胞癌	2	10	0	0		0	S7	14	1	0	0	0		0			2024.8.29	0	490.4	17	21	36	9.0	12.5	5.40	138	125
0003168105	陈小兰	女	47岁	2024-07-30	肝局灶性结节状增生（FNH）	肝局灶性结节状增生（FNH）	甲亢	5	0	0		0	S8、S7/8	16、14	2	0	0	0		0			术后未复查	2	1.06	15	11	37.8	8	13.3	6.03	122	266
0001400781	刘飞云	男	60岁	2024-07-30	0	0	1、2	7	1	1		0	S7	12	1	0	0	0		0			2024.11.15	0	1.23	22	7	46.1	8.5	14.5	7.65	143	132
1002147191	张业旁	男	52岁	2024-07-27	0	中分化肝细胞癌伴灶性坏死	0	14	1	1		0	S7、S5、S5/8	6、6、5	3	0	0	0		0			术后未复查	0	10.01	34	27	42.1	12	13.2	6.2	142	128
1002147897	郭汉波	男	75岁	2024-07-27	1	肠腺癌转移	肠癌、1	24	0	0		0	S6、S7、S5/8、S2、S2/3、S2/3、S2/4、S5	10mm、10mm、10mm、15mm、10mm、10mm、20mm、20mm	8	1	0	0		1	1（S1）	2024.9.29	2024.9.29	2	0.969	17	9	32.7	9.5	13.2	4.17	114	200
0003717978	沈北京	男	65岁	2024-07-25	0	0	0	6	0	0		0	S5/6	11	1	0	0	0		0			术后未复查	0	2.33	20	6	40.5	15.4	13.1	5.08	142	154
1001101711	陈子摇	男	75岁	2024-07-24	0	中分化肝细胞癌	1、皮肤黑色肿物	9	0	0		0	S5/8	56	1	0	1	0		0			术后未复查	2	18.7	27	42	41.8	11.8	13.8	7.35	130	210
1001560415	丘小兵	男	58岁	2024-07-23	血管瘤	血管瘤	1	7	1	1		0	S8	15	1	0	0	0		0			2024.8.30	0	1.29	17	19	44.5	13.6	14.7	5.73	149	110
1002134822	刘耀青	男	49岁	2024-07-23	肝局灶性结节状增生（FNH）可能	肝局灶性结节状增生（FNH）可能	0	13	1	1		0	S7（2个）	38、15	2	1	0	0		0			2024.9.20	2	2.5	35	31	34	18.9	13.7	4.84	152	137
0003592659	陈任生	男	61岁	2024-07-23	0	高分化肝细胞癌	1	7	1	0		0	S7、S4	20、12	2	1	0	0		0			2024.10.24	0	1.46	23	13	43	38.2	13.1	4.78	141	168
0003987463	徐燕齐	女	52岁	2024-07-20	0	肝细胞癌，倾向中分化	贫血	5	1	1		0	S5/6、S8	12、10	2	0	0	0		0			2024.11.4	0	12.3	27	17	39.7	36.8	18.8	2.29	104	52
1002143141	薛新云	男	62岁	2024-07-20	0	肝细胞癌，倾向中-低分化	0	6	0	0		0	S4/8	32	1	0	1	0		0			2024.10.21	0	1169	26	34	37.4	5.1	14.3	8.31	158	364
1002125186	邱建兰	女	65岁	2024-07-19	0	中分化肝细胞癌	0	15	0	0		0	S7/8	22	1	1	0	0		0			2024.8.26	0	6.89	24	18	37.2	7	13.6	3.64	128	127
0004003554	吴明学	男	48岁	2024-07-19	0	中分化肝细胞肝癌	3	11	0	0			S7/8	7	1	0	0	0		0			2024.11.14	0	1.56	26	20	39.4	13	12.8	5.58	152	182
1002128645	郭志洪	男	36岁	2024-07-18	0	中分化肝细胞癌	0	3	1	1		0	S6（3个）	14、35、10	3	1	0	0		0			2024.10.16	0	51.07	29	28	45.6	7.5	12.7	5.07	167	150
0003776645	郑金玲	女	31岁	2024-07-17	肝良性结节	慢性炎性肝损伤（G1S0-1）伴部分肝细胞大滴状脂肪变性（10%）改变	0	7	0	0			：S8、S6肿块（3个）	25	4	0	0	0		0			2024.7.29	2	1.63	16	18	41.9	2.88	13.3	6.64	125	312
1002132271	廖锡州	男	72岁	2024-07-17	0	中分化肝细胞癌	0	9	1	1		0	S6/7、S8	32、32	2	1	0	0		0			2024.11.21	1	108.1	43	30	34.9	11.6	16.1	2.56	83	356
0003647578	冼水林	男	61岁	2024-07-17	0	高-中分化肝细胞癌	1、2	15	1	0		0	S7（2个）	20、10	2	0	1	1	感染	0			2024.9.29	0	7.75	48	23	27.4	37.6	15.4	4.71	117	112
1002073606	谢童盛	男	59岁	2024-07-17	0	治疗后反应，未见确切存活肿瘤细胞	0	4	1	0		0	S7/8（3个）、S6/7（1个）、S6/7（1个）	5mm、5mm、4mm、20mm、4mm	5	1	0	0		1	1（S6）	2024.8.18	2024.8.18	0	19.69	46	15	29.7	11	14.1	4.38	125	220
0000820996	黄士忠	男	86岁	2024-07-17	0	0	1、3	6	0	0		0	S6	21	1	0	0	0		0			术后未复查	0	3.41	21	21	42.5	10.9	13.1	7.75	143	235
1001967728	卢贤辉	男	52岁	2024-07-15	0	中分化肝细胞癌	1、2、4	5	0	0		0	S6/7、S8（2个）	13、11、28	3	1	0	0		0			2024.8.22	0	2.4	11	14	39	1.9	13.1	5.56	116	188
1002126632	黄才钦	男	78岁	2024-07-15	0	中-低分化肝细胞癌	0	9	0	0		0	S7/8（2个）	12、26	2	1	0	0		0			术后未复查	0	131.96	79	46	35.8	10.4	14.5	4.66	119	145
0002107545	陈奕萱	男	81岁	2024-07-15	0	综合治疗后改变，未见确切存活肿瘤细胞	1、2、3	12	1	1		0	S8（2个）	20、15	2	1	0	0		1	1	2024.8.22	2024.11.14	2	4.53	33	29	36.8	11.7	13.7	1.55	111	41
1001563008	杨永根	男	56岁	2024-07-13	0	0	0	4	0	0			S8	9	1	0	0	0		0			2024.11.13	0	1.87	21	19	43.5	12.2	13.1	5.34	157	226
1001681108	黄永洪	男	54岁	2024-07-12	0	中分化肝细胞癌	0	11	0	0			S8	30	1	1	0	0		0			术后未复查	0	6.2	32	21	42.3	15.5	14	3.96	124	70
1001486476	张世球	男	56岁	2024-07-12	0	0	1、2	11	1	1			S6/7、S7	35、20	2	1	0	0		1	1	2024.9.26	2024.9.26	0	801.6	47	26	27.8	25.8	17.1	2.63	99	55
1002108087	李开河	男	47岁	2024-07-11	0	肝细胞癌，倾向中分化	0	11	1	1			S6	36	1	1	0	0		0			2024.12.4	0	6.55	55	60	39.1	14.3	14.8	2.33	144	100
1001057902	陈琪	男	58岁	2024-07-11	0	0	2	6	1	0			S2	22	1	0	1	0		0			术后未复查	2	46.24	56	42	30.8	22	17	2.78	118	35
1002112504	唐学刚	男	44岁	2024-07-05	右肾肿瘤	0	1	4	0	0			右肾	22	1	0	0	0		0			术后未复查	0	4.66	25	39	43.6	15.6	13	7.15	150	273
0000684362	梁仲豪	男	53岁	2024-07-02	0	0	0	4	0	0			S4/8	10	1	0	0	0		1	1	2024.8.9	2024.11.9	0	5.56	33	24	36.5	16.94	13.9	6.65	158	145
0001967013	屈孝祥	男	62岁	2024-06-27	0	0	0	20	1	1			S8	32	1	1	0	0		0			术后未复查	0	4.32	26	16	30.7	10.7	15.4	1.44	83	41
1000672138	刘记桥	男	67岁	2024-06-27	0	中分化肝细胞癌	1、2	9	1	0			S8（2个）	40、15	2	1	0	0		0			2024.11.10	0	5.56	33	24	36.5	16.94	13.9	6.65	158	145
1001250800	穆文文	女	32岁	2024-06-26	肾上腺皮质腺瘤	肾上腺皮质腺瘤	1、低血钾	21	0	0			左肾上腺	20	1	0	0	1	出血	0			术后未复查	2	0.90					14.1	7.41	120	193
0004450005	周秋艳	女	51岁	2024-06-26	肾上腺皮质腺瘤	0	1、低血钾	13	0	0			左肾上腺	16	1	0	0	0		0			术后未复查	2		13	10	38.3	14.2	13.5	5.78	127	296
1001970246	王世卓	女	36岁	2024-06-20	肾上腺皮质腺瘤	肾上腺皮质腺瘤	2、库欣综合征	13	0	0			左肾上腺	30	1	0	0	0		0			2024.7.12	2	1.49					12.5	6.71	101	298
1001296096	吴华清	女	63岁	2024-06-20	肾上腺皮质腺瘤	0	1、低血钾	15	0	0			左肾上腺	12	1	0	0	0		0			2024.7.8	2						12.2	4.99	135	252
1002076975	莫国强	男	64岁	2024-06-20	0	中-低分化肝细胞癌	0	35	0	0			S8、S5	11	2	0	0	0		0			2024.10.28	0	2.71	23	13	34.3	10.86	14.9	7.56	125	227
1001015671	王光海	男	69岁	2024-06-19	1	腺癌	1、2、肠癌	14	0	0			S4（1个）、S8（2个）、S7（2个）、S5（1个）	20mm、10mm、20mm、10mm、27mm、30mm	6	1	0	0		0			2024.9.27	2	1.90	41	61	42.6	13	12.2	3.57	118	149
1002090557	何光辉	男	57岁	2024-06-18	0	0	0	13	1	0			S8	10	1	0	0	0		0			术后未复查	0	16.6	93	146	31.6	5.4	15.2	6.96	112	179
1002081982	丁海峰	男	68岁	2024-06-17	0	0	1	18	1	1			S8、S6	20、44	2	1	0	0		0			2024.10.28	0	801.8	47	78	39	12.4	13.5	6.92	147	163
1000419596	杨星	男	47岁	2024-06-15	0	慢性乙型肝炎	0	12	0	0			S8、S7	12	2	0	0	0		0			2024.11.27	0	83.35	23	19	48.5	10.8	14.1	3.39	149	175
1001328361	陈亚寿	男	60岁	2024-06-14	0	0	0	8	1	1			S1、S7	28、14	2	1	0	0		0			2024.11.30	0	10.5	36	7	29.9	12.7	14	3.06	123	53
1001415815	许志松	男	65岁	2024-06-08	0	肝细胞高级别异型增结节，部分癌变为高分化肝细癌	2	5	1	1			S5/8	23	1	0	0	0		1	0	2024.12.4	2024.12.4	0	7.69	20	21	35.5	12.1	13.8	4.23	141	88
0001632876	叶赞其	男	65岁	2024-06-05	0	高-中分化肝细胞癌	0	8	1	1			S5/6、S7/8、S6	20、43、16	3	1	0	0		0			2024.10.11	0	2.36	28	25	43.3	12.3	14.7	8.55	5.22	159
1002060298	麦梅	女	54岁	2024-06-05	0	中分化肝细胞癌	恶性胃肠道间质瘤	11	1	1			S7、S8	10、15	2	1	0	0		0			2024.7.9	0	118.8	26	17	35.7	8.2	13.4	2.92	123	86
0004347754	彭学高	男	57岁	2024-06-04	0	0	2	15	1	1			S6	12	1	0	0	0		0			2024.8.12	0	3.91	40	36	22	27	13.7	8.98	120	176
1001577904	黄荣瑞	男	74岁	2024-05-31	1	胃肠道转移来源	肠癌	4	0	0			S6	15	1	0	0	0		1	1	2024.12.6	2024.12.6	2	2.06	18	11	39.2	8.2	13.1	4.76	103	206
1001833474	邱明湘	男	84岁	2024-05-30	1	肠腺癌肝转移	肠癌	15	0	0			S8（2个）	5、8	2	0	0	0		1	1	2024.7.8	2024.10.25	2	2.81	17	13	32.8	4.6	13.8	7.77	100	213
1000483345	杨惠生	男	42岁	2024-05-29	0	高-中分化肝细胞癌	0	16	1	1			S5/6	27	1	0	1	0		0			2024.7.15	0	4.19	49	55	44.3	13.59	14	8.72	160	145
1002048696	刘美风	女	55岁	2024-05-24	肾上腺皮质腺瘤	0	1、低血钾	11	0	0			左肾上腺	14	1	0	0	0		0			术后未复查	2						14.3	8.03	133	126
0001171976	杨丽招	女	56岁	2024-05-21	肾上腺皮质腺瘤	肾上腺皮质腺瘤	1、2、甲状腺切除	5	0	0			右肾上腺	15	1	0	0	0		0			术后未复查	2		15	21	45	21.7	13.8	7.7	133	205
0001200772	黄俊标	男	66岁	2024-05-20	肾上腺皮质腺瘤	0	1、2	13	0	0			右肾上腺	16	1	0	0	0		0			2024.7.22	2						11.8	6.22	131	281
1002050256	朱雅彬	男	67岁	2024-05-20	0	中分化肝细胞癌	0	11	1	1			S8	25	1	0	1	0		0			2024.8.1	0	3.27	40	22	31.1	25.6	16.1	4.86	108	86
1000510796	张金吝	男	61岁	2024-05-16	0	中分化肝细胞癌	0	12	1	1			S6	15	1	0	0	0		0			术后未复查	0	15.84	60	47	39.5	36.3	15.7	4.12	108	65
1002040847	蔡燕杏	女	53岁	2024-05-15	肾上腺皮质腺瘤	肾上腺皮质腺瘤	1	9	0	0			左肾上腺	17	1	0	0	0		0			术后未复查	2						13.9	7.61	140	301
0004036207	蔡美荣	男	68岁	2024-05-14	1	0	0	7	1	1			S3、S2、S8	15、11、20	3	1	0	0		0			2024.9.28	0	5.48	30	39	43.6	17.1	16	4.94	165	104
0003863360	杨年广	男	53岁	2024-05-07	1	0	0	18	0	0			S2/4、S6	8、8	2	0	0	0		0			2024.9.11	0	1.62	26	28	35.6	4.7	12.6	9.05	127	238
1002022097	余凤翥	男	66岁	2024-04-30	0	肝细胞腺瘤与高分化肝细胞癌相鉴别	3	11	0	0			S4	25	1	0	1	0		0			2024.8.30	2	1.52	23	19	45.7	9.6	12.9	4.69	119	194
0002499196	何仕良	男	60岁	2024-04-30	0	0	0	10	1	0			S2/4、S6	6	1	0	0	0		0			2024.11.29	0	6.14	32	24	43.9	20.25	12.8	7.72	136	227
0004747381	吴对丽	女	55岁	2024-04-28	0	0	0	5	1	1			S4	17	1	0	0	0		0			2024.9.25	0	16.14	40	29	42.9	15.4	14.2	3.36	111	87
0000127036	马劲鸣	男	56岁	2024-04-26	0	肝细胞癌	2	6	1	1			S6（2个）	8、25	2	1	0	0		0			2024.9.25	0	18.02	36	25	35.3	9.2	13.6	5.66	84	168
1001184546	郑烁辉	男	58岁	2024-04-26	1	0	0	5	1	0			S8、S7、S6	14、10、8	3	0	1	0		0			2024.11.11	1	8.76	23	22	46.4	14.3	14	10.77	149	298
0000027595	张国茂	男	37岁	2024-04-25	0	部分癌变为高分化肝细胞癌	0	7	0	0			S8	26	1	1	0	0		0			2024.9.12	0	25.7	22	27	49.1	9.2	13.9	4.47	150	254
0002955195	古新有	男	49岁	2024-04-24	0	中分化肝细胞癌	0	9	0	0			S2（2个）	10、34	2	1	0	0		0			2024.9.2	0	3.29	21	15	48.2	16.6	12.4	4.63	153	196
0000179843	林子强	男	67岁	2024-04-24	0	0	1、2	7	1	1			S3、S8	14、8	2	0	0	0		0			202.9.23	0	3.8	55	39	37.7	11.6	13.3	5.48	138	203
0000011598	黄华禧	男	83岁	2024-04-24	0	0	1、2、3	43	1	1			S3（3个）	17、15、13	3	0	1	1	腹腔感染、消化道出血	死亡			2024.6.22	0	15.58	39	18	34.4	28.9	18.6	3.92	94	71
1001886840	欧群芳	女	61岁	2024-04-23	0	中分化肝细胞癌	0	6	1	0			S2	16	1	0	0	0		0			2024.10.22	2	2.18	26	12	32	23.8	15	2.07	103	50
1001951447	陈满祥	男	65岁	2024-04-18	0	0	0	9	0	0			S7	21	1	0	1	0		0			2024.9.4	2	12.78	46	41	37.3	6.6	13.4	6.95	153	271
1001987053	曾慧玲	女	67岁	2024-04-16	胆管细胞癌	中分化腺癌	甲亢甲状腺切除	8	0	0			S4/8	33	2	1	0	0		0			2024.12.2	2	3.93	19	19	35.25	5.6	12.6	7.17	121	29
1001663451	邓华宏	男	51岁	2024-04-16	0	0	1	7	1	1			S5、S5/8	6、11	2	0	0	0		0			2024.11.28	0	1.61	38	40	42.7	8	13.8	5.7	130	224
0003281618	胡炳明	男	57岁	2024-04-16	0	中分化肝细胞癌	0	15	1	1			S8、S4	28、14	2	0	1	0		0			2024.9.27	0	91.69	17	24	44.2	7	12.4	5.48	143	233
1000158161	吴惠思	女	31岁	2024-04-11	0	0	0	4	0	0			S7/8、S7	18、10	2	1	0	0		1	1	2024.5.13	2024.11.19	0	134.59	23	27	36.1	11.4	13.5	7.62	111	257
1001820892	廖彩祥	男	54岁	2024-04-10	0	0	0	10	1	0			S7、S8	5、20	2	0	0	0		0			2024.7.15	0	6.07	27	20	37.9	6.1	12.6	5.35	144	104
1001607497	林美娇	女	60岁	2024-04-10	0	高-中分化肝细胞肝癌	0	7	1	1			S8	11	1	0	0	0		0			2024.8.13	0	4.42	26	23	38.3	10.1	14.6	3.82	134	145
0001223297	陈国勤	女	34岁	2024-04-03	肝局灶性结节状增生（FNH）	肝局灶性结节状增生（FNH）	0	5	0	0			S4	21	1	0	0	0		0			2024.10.24	2	1.57	23	27	41.5	6.21	11.9	6.39	125	322
1001474533	陈少妹	男	70岁	2024-04-03	0	0	1、2	7	1	0			S6	10	1	0	0	0		0			2024.10.31	0	5.87	19	18	37.3	12.3	13.9	5.8	147	148
0003395459	黄汝卡	男	60岁	2024-04-02	0	0	1	3	1	1			S7、S8肿块（3个）	20	4	0	1	0		0			2024.11.8	0	76.85	30	37	39.9	10.9	13.2	5.44	143	139
1001965254	李锦祥	男	50岁	2024-03-29	0	浸润性癌，不除外为混合型肝细胞-胆管细胞癌可能	0	16	1	0			S8	22	1	1	0	0		0			2024.11.3	1	18.63	104	152	38.9	18.8	13.6	6.08	149	199
1001957726	杨敏	男	46岁	2024-03-29	0	中-低分化肝细胞肝癌	0	13	1	1			S7（3个）	20、12、12	3	0	1	0		0			2024.9.4	0	1.68	44	29	35.1	55.4	15.9	6.26	140	121
1001951731	LUO XUE ZHAN	女	68岁	2024-03-26	0	结节性肝硬化	0	16	1	1			S2/3、S8	14、6	2	1	0	1	感染	0			2024.11.15	2	7.76	77	52	26.1	21.3	17	3.07	123	52
1000581108	麦合和	男	53岁	2024-03-26	0	中-低分化胆管细胞癌	0	5	0	0			S6	22	1	0	1	0		0			2024.11.25	0	2.63	25	27	38	9.8	12.6	3.96	111	114
1001602390	游绍彬	男	56岁	2024-03-22	0	0	1	8	1	1			S1、S7、S5/8	15、12、11	3	0	1	0		1	1	2024.7.24	2024.11.16	0	15.46	23	25	38.4	9.4	13.9	5	131	207
0003827468	官其端	男	50岁	2024-03-21	0	0	脾切	7	1	1			S4/8	21	1	0	1	0		1	1	2024.7.10	2024.7.10	0	116.6	30	13	27.6	8.9	15.6	6.14	67	291
1001956492	严建波	男	39岁	2024-03-20	0	中-低分化肝细胞癌	0	12	1	0			S5/8	21	1	1	0	0		0			2024.10.19	0	1.95	22	22	39.8	19.2	13.8	5.33	126	201
0000386469	李宝秋	男	69岁	2024-03-19	0	0	3、低血钾	21	1	0			S3	12	1	0	1	0		0			2024.11.15	2	7.06	25	15	40.6	11.8	13.7	5.27	4.5	183
1001936097	杨永强	男	60岁	2024-03-13	0	中分化肝细胞癌	1	13	1	1			S8、S6	16、31	2	1	0	0		1	1	2024.4.17	2024.12.6	0	14.87	55	35	26.9	6.8	15.2	5.13	128	155
1001947785	吴永进	男	69岁	2024-03-13	0	中分化肝细胞癌	1	8	0	0			S7/8	8	1	0	0	0		0			2024.7.10	0	8.29	31	37	34	10.5	13.1	4.94	139	193
1000155560	陈妃和	男	60岁	2024-03-13	0	0	0	5	1	0			S3	31	1	1	0	0		0			2024.10.24	0	9.92	25	22	33.6	9.7	13.1	8.37	148	179
0003639481	尤日葵	男	64岁	2024-03-12	0	中分化肝细胞癌	0	7	1	0			S8	21	1	1	0	0		0			2024.9.30	0	1.61	29	29	44	14.6	13.4	7.72	151	203
0004299352	杨其清	男	62岁	2024-03-09	1	轻度炎性肝损伤（G1S0），结合临床，考虑为化疗后药物损伤所致，未见确切癌	肠癌、甲状腺癌	7	1	0			S6、S7	9	2	0	0	0		1	0	2024.6.25	2024.6.25	2	3.58	35	34	43.2	12.8	13.4	5.51	145	101
1000938317	钟运双	男	60岁	2024-03-08	0	中分化肝细胞癌	脾切	19	1	1			S7（3个）	25、8、7	3	1	0	1	发热	0			2024.10.18	0	29.6	23	16	37.4	9.3	15.1	6.85	122	178
1001181936	吴绍良	男	74岁	2024-03-06	0	0	0	4	1	0			S5/8	12	1	0	0	0		0			2024.10.17	0	1.52	21	12	38.5	7.5	13.3	3.55	121	96
0003787464	邹华明	男	66岁	2024-03-06	0	0	1、2、脑出血	6	1	1			S5/8	12	1	0	0	0		0			2024.7.10	2	2.57	39	41	34.9	27.8	14.1	4.02	114	88
1000858930	陈文	男	64岁	2024-03-01	0	中分化肝细胞癌	0	7	1	1			S4	12	1	0	0	0		0			2024.10.10	0	880.8	42	14	31	23.3	16.1	3.99	139	114
0000376780	刘志伦	男	70岁	2024-02-28	0	0	0	10	1	0			S4/8	12	1	0	0	0		0			2024.10.12	0	1.64	29	34	41.9	13.7	13	5.85	137	178
0003665524	武前程	男	56岁	2024-02-26	0	0	0	7	0	0			S3、S2/3、S2、S4	10	4	0	0	0		0			2024.7.11	0	2.67	18	21	44.8	6.4	12.9	8.49	160	240
1001913948	邓志华	男	51岁	2024-02-26	0	慢性乙型肝炎伴结节性肝硬化	2	12	1	1			S4、S7/8	26	2	1	0	0		0			2024.10.8	0	12.9	42	45	34.6	9.6	14.6	4.9	121	130
1000250793	杨益发	男	57岁	2024-02-23	0	中分化肝细胞肝癌	0	9	1	1			S7/8	25	1	0	1	0		0			2024.12.4	0	5.14	23	11	45.2	24.7	13.5	5.68	136	203
1001842746	徐潇帆	男	29岁	2024-02-21	肝局灶性结节状增生（FNH）	肝局灶性结节状增生（FNH）	0	3	0	0			S6、S8	10、46	2	1	0	0		0			2024.3.25	0	2.03	22	33	50.9	8.7	11.8	5.42	159	222
1001526722	林友清	男	68岁	2024-01-31	0	慢性肝炎改变	1	8	1	1			S4/8、S2	6、23	2	0	1	0		0			2024.6.28	0	10.2	34	34	36	14.6	14.6	3.05	138	72
0004234484	蔡亚长	男	74岁	2024-01-29	0	慢性炎性肝损伤	1、2	18	0	0			S8（2个）	16	1	0	0	0		0			2024.7.26	0	2.43	41	22	39.1	11.4	13.9	4.62	137	112
1001831274	陈立海	男	44岁	2024-01-26	0	0	0	7	0	0			S7/8	20	1	0	0	0		0			2024.10.15	0	2.46	16	18	42.3	8.6	14	6.06	133	168
1001880614	李秀兰	女	51岁	2024-01-26	1	腺癌	1、肠癌	10	0	0			S6、S7、S5	22、17、17	3	1	0	0		0			2024.9.7	2	1.9	17	13	38.9	6.9	12.3	5.23	127	192
1001872909	郭满兰	女	78岁	2024-01-24	0	中分化肝细胞癌	1	7	0	0			S5/6	36	1	1	0	0		0			2024.3.29	2	5.7	17	13	32.7	4.6	12.5	9.39	116	212
1000560364	谢岱文	男	54岁	2024-01-24	0	高分化肝细胞性肝癌	1、2	7	1	1			S2、S4	6、12	2	0	1	0		0			2024.10.7	1	3.32	34	32	42.4	8.8	14.6	5.24	125	150
1001866276	张可燕	女	49岁	2024-01-22	0	轻度慢性炎性肝损伤	0	6	0	0			S8（2个）	21	1	0	1	0		0			术后未复查	2	3.94	15	16	41.2	6	13.2	7.95	138	273
1001883714	李波	男	61岁	2024-01-19	0	中分化肝细胞癌	0	15	0	0			S5/6	20	1	0	0	0		0			2024.2.27	0+1	22.15	25	26	41.6	9.7	15.1	4.2	147	115
0000086399	黄伟忠	男	53岁	2024-01-19	1	0	1、肠癌	5	0	0			S1	27	1	1	0	0		1	1	2024.11.9	2024.11.29	0	2.75	28	32	46.6	13.4	13.1	5.33	141	165
1001878902	蔡育	男	60岁	2024-01-17	0	慢性炎性肝损伤	0	4	1	1			S8	13	1	0	1	0		0			2024.12.6	2	2.78	16	19	44.2	12.9	13.2	5.64	145	217
0000664184	杨彬弟	男	42岁	2024-01-17	1	慢性炎性肝损伤（G1S1）伴局灶伴肝细胞低级别异型增生改变，	肠癌	9	0	0			S8	10	1	0	0	0		0			2024.2.25	2	2.36	22	33	40.7	22.4	13.5	4.07	129	161
0000885482	张桂林	男	41岁	2024-01-17	1	0	肝移植术后	3	0	0			S8	10	1	0	0	0		0			2024.6.5	2	154	23	7	38.3	12.3	12.1	5.71	123	201
1000595311	陈兆荣	男	65岁	2024-01-17	1	中分化肝细胞癌	0	8	1	1			S2、S5/6	24、10	2	1	0	0		0			2024.3.6	1	3.13	32	28	39.2	17.6	14.9	3.5	120	70
0000957888	钟俊洁	男	40岁	2024-01-12	1	中-低分化肝细胞癌	精神分裂症	10	1	1			S8	36	1	1	0	0		0			2024.11.21	0	4.63	43	79	44.7	11.01	15	7.74	160	199
0000223254	李征海	男	70岁	2024-01-12	1	肝细胞肝癌	1、2	7	0	0			S4（1个）、S8（2个）、S7（1个）	6mm（S4）、8mm（S8）、10mm（S7）、18mm（S8）	4	1	0	0		0			2024.8.29	0	1.57	19	24	44	8.8	12.3	5.69	143	224
1001850317	林伟彬	男	43岁	2024-01-05	1	高-中分化肝细胞癌	痴呆	12	0	0			S4	31	1	1	0	0		0			2024.7.23	0	2.51	34	33	43	5.5	13.4	5.35	148	195
1001849399	任致旺	男	48岁	2023-12-28	0	中分化肝细胞癌	0	18	0	0			S2、S5/6	24、25	2	1	0	1	感染发烧	0			2024.11.28	0	150.7	25	25	46	17.6	13.3	5.63	144	238
0002460895	梁昆瑞	男	66岁	2023-12-28	0	中分化肝细胞癌	1	18	0	0			S8（2个）、S6	24、10、8	3	0	0	0		0			2024.11.26	0	5.28	22	21	42	14.9	13.2	6.39	153	207
1001836458	刘海波	男	46岁	2023-12-28	0	高级别异型增生结节、局部癌变	2	5	1	0			S7	10	1	0	0	0		0			2024.10.17	0	31.64	66	133	39.1	14.2	16.1	6.11	153	160
1000369912	韦经荣	男	64岁	2023-12-27	0	中分化肝细胞癌	1	7	1	1			S6/7	20	1	0	0	0		0			2024.8.26	0	1.82	42	32	37.9	16.3	15.6	4.74	112	89
1001849351	林俊钦	男	59岁	2023-12-27	0	中分化肝细胞癌	0	8	0	0			S8	16	1	0	0	0		0			2024.9.4	0	85.1	25	26	39	10.7	13.4	5.06	141	169
1001214068	罗水华	男	76岁	2023-12-27	0	0	1、帕金森	17	0	0			S6/7	10	1	0	0	0		0			2024.3.9	0	23.72	17	11	36.3	9.4	16.8	5.98	100	135
1001624010	陈念香	女	65岁	2023-12-22	1	肠腺癌转移	肠癌、3	12	0	0			S5/6、S2	31、25	2	1	0	0		0			术后未复查	2	5.03	23	15	36.3	3.1	12.1	4.46	104	232
1001841229	彭红波	男	49岁	2023-12-21	0	局灶伴肝细胞低级别异型增生；周围肝组织另见海绵状血管瘤形成	1	5	0	0			S8	10	1	0	0	0		0			2024.1.20	0	未查	19	25	44.5	18.1	13.2	5.72	144	258
1001782027	池成立	男	54岁	2023-12-21	0	0	0	5	1	0			S4、S8	15	2	0	0	0		1	1	20248.2	2024.9.26	0	175.09	28	25	38	11.6	13.1	5.05	140	169
1000094380	范映卿	女	66岁	2023-12-20	0	0	0	7	1	1			S5/8	15	1	0	0	0		1	1	2024.6.29	2024.10.31	0	3.91	23	20	35.2	7.6	13.9	2.75	114	57
0000577841	毕英锐	男	75岁	2023-12-20	肝结节性再生可能性大	肝结节性再生可能性大	1、肝移植	9	0	0			S8	28	1	1	0	0		0			2024.10.30	2	3.7	13	8	42.3	22.9	13	5.37	136	207
1001825478	钱汝图	男	59岁	2023-12-15	0	高-中分化肝细胞癌	0	15	1	1			S8	35	1	1	0	0		0			2024.11.20	0	8.97	50	36	35.8	21.5	14.3	4.83	144	124
1001822023	何贤山	男	73岁	2023-12-13	0	中分化肝细胞癌	0	9	1	0			S7/8	36	1	1	0	0		0			2024.1.16	0	7.76	28	24	38.3	24.2	13.7	6.14	136	130
1001825343	谢沛洪	男	55岁	2023-12-08	0	慢性炎性肝损伤（G2S3）伴局灶肝细胞低级别异型增生，不除外取自肿物边缘	骨肿瘤	10	0	0			S8	23	1	1	0	0		0			2024.10.25	0	380.74	23	26	35.3	3.8	13.2	5.2	134	213
0001048434	谭劲中	男	63岁	2023-12-08	0	0	0	2	0	0			S5	22	1	1	0	0		0			2024.11.8	0	2.84	36	18	46.1	13.4	12.5	4.41	142	165
1001714917	凌卫	男	57岁	2023-12-07	0	肝细胞癌综合治疗后改变	1、2	10	1	1			S8	20	1	1	0	0		0			2024.1.9	0	4.89	34	33	28.4	8.8	13.9	2.62	72	119
0000070114	连文洲	男	57岁	2023-11-04	0	未见确切癌	0	8	1	1			S3、S7、S8	13、26、23	3	0	0	0		0			2024.10.11	0	2.51	23	22	38.1	9.09	13.3	4.93	151	160
1001484804	莫雅怡	女	36岁	2023-12-01	0	0	0	9	0	0			S6、S7	12、5	2	0	0	0		1	1	2024.2.26	2024.11.27	0	22.71	17	7	38.4	8.9	13.1	5.46	111	266
1000759534	范小勇	男	49岁	2023-12-01	0	中分化肝细胞癌	0	9	1	1			S4（1个）、S6（2个）、S7（2个）	8mm、7mm、21mm、10mm、9mm	5	1	0	0		0			出院后未复查	0	34.3	40	41	37.1	15.9	13.6	4.22	139	97
1001191876	区锦波	男	56岁	2023-11-30	0	不排除高级别异型增生结节、癌变为高分化肝细胞癌	2	9	1	1			S5、S8、S8（包膜下）	10、25	2	0	1	0		0			2024.4.24	0	5.55	27	13	40.7	14.9	14.5	7.71	131	118
0003150914	苏彩明	女	70岁	2023-11-29	0	0	0	7	1	1			S8、S6（2个）	20、18、20	3	1	0	0		0			2024.1.5	2	31.61	34	24	25.9	16.9	16.8	3.45	122	136
0000020317	何少颖	女	40岁	2023-11-29	0	中分化肝细胞性肝癌	0	3	0	0			S8	16	1	1	0	0		0			2024.9.23	0	58.79	43	60	31.9	10.8	14.4	4.64	128	222
1001804152	钟汝为	男	46岁	2023-11-28	0	肝细胞性肝癌，考虑为中-低分化	1	7	1	0			S6/7	16	1	1	0	0		0			术后未复查	0	882.63	23	26	33.7	11.8	14.6	7.43	136	213
1000305200	杨水陀	男	64岁	2023-11-24	0	0	胃恶性肿瘤	7	1	1			S2/3	9	1	0	0	0		0			2024.8.26	0	63.56	22	13	37.4	10.7	13.2	4.63	128	257
1000513139	叶佐港	男	29岁	2023-11-22	0	中-低分化肝细胞癌	0	9	0	0			S4、S6	20、8	2	0	0	0		1	1	2024.10.28	2024.12.3	0	5.02	22	42	45.2	13.9	13.5	6.49	157	158
1001783501	林宇峰	男	52岁	2023-11-18	0	中分化肝细胞癌		14	1	1			S5	55	1	0	1	0		0			2024.5.15	1	>1210	206	183	32.5	24.67	13.6	4.83	125	105
1001792393	郑常南	男	50岁	2023-11-17	1	结肠中分化腺癌转移	肠癌	8	0	0			S7/8	40	1	0	0	0		0			术后未复查	2	0.81	21	16	37.7	9.3	12	4.34	104	290
0003069999	刘克良	男	73岁	2023-11-15	0	0	0	5	1	0			S5（4个）	16	4	0	0	0		0			2024.12.7	2	1.94	20	27	40.3	8.1	12.4	5.1	124	153
0000070114	连文洲	男	57岁	2023-11-14	0	中分化肝细胞肝癌	0	8	1	1			S3、S7、S8	13、26、23	3	0	0	0		0			2024.10.11	0	2.51	23	22	38.1	9.09	13.3	4.93	151	160
0003941759	陆富豪	男	67岁	2023-11-10	0	0	0	9	1	1			S4/8、S2	24、39	2	1	0	0		1	1	2024.8.21	2024.11.25	0	3.51	27	20	36.6	29.5	14.3	4.86	138	147
1001458657	赵晓清	男	46岁	2023-11-09	0	0	1、2	7	1	1			S3、S4	8、20	2	0	0	0		1	1	2024.11.18	2024.11.25	0+1	178	41	18	32.9	8.4	12.4	2.59	118	45
1001772157	杨志雄	男	68岁	2023-11-09	0	中-低分化肝细胞性肝癌	1	9	1	1			S5/8	32	1	1	0	0		0			2024.11.13	2	529.9	33	49	37.9	18.3	13.3	2.9	125	94
0001638116	卢赛华	女	57岁	2023-11-08	0	结节性肝硬化伴海绵状血管瘤	0	19	1	1			S2/4、S3	20、33	2	1	0	1	发热	0			2024.10.28	0	4.51	29	22	36.4	18.9	15.7	2.03	141	66
1001674412	李海洲	男	69岁	2023-11-07	0	0	0	6	1	0			S2（2个）、S1	10、9、29	3	1	0	0		1	1	2024.4.26	2024.11.26	0	7.98	27	22	40.7	28.2	13.4	3.03	148	147
1001738351	曾新妹	男	58岁	2023-11-02	0	中分化肝细胞癌	0	7	1	0			S5/8	19	1	0	0	0		0			2024.9.10	0	1.62	18	20	40.5	8.6	13.8	4.9	146	215
1000997436	房才员	男	51岁	2023-11-01	0	中分化肝细胞癌	0	8	1	1			S7	20	1	0	0	0		0			出院后未复查	0	5.3	17	22	39.6	33.8	15.5	5.12	121	99
0003286768	符保山	男	49岁	2023-10-27	0	低分化肝细胞肝癌	1	20	1	1			S4/8	16	1	0	0	0		0			2024.3.22	0	221.09	21	21	48.1	5.34	12.8	10.07	145	268
1001745426	唐灼文	男	53岁	2023-10-27	0	肝细胞癌，考虑为中分化	0	4	1	1			S5/8、S8	6、31	2	1	0	0		0			2024.10.30	0	13.17	45	79	36.9	8.6	13	5.54	158	187
0000420483	袁焕明	男	52岁	2023-10-27	0	中分化肝细胞癌	0	10	1	0			S4、S8、S5	20、27、37	3	1	0	0		0			2024.10.28	0+1	5.56	27	40	33.2	12.6	13.1	7.63	159	185
0004191903	梁焕棠	女	38岁	2023-10-25	肝良性结节	0	0	8	0	0			S6、S7、S7/8、S5	15、10、12、8	4	0	0	0		0			2024.11.22	0	3.1	20	29	46.9	8.9	13	8.46	137	402
0003863629	张德才	男	58岁	2023-10-24	0	高-中分化肝细胞肝癌	0	12	0	0			S7	24	1	0	0	0		0			2024.12.9	0	3.59	17	13	36.8	8.98	14	3.98	139	130
0003404251	蔡平	男	59岁	2023-10-24	0	高分化肝细胞肝癌	2	14	1	1			S8（2个）	13、8	2	0	0	0		0			2024.6.11	0	2.61	19	20	41.2	11.75	14.8	4.09	136	69
0000446008	黄焕南	男	67岁	2023-10-20	0	0	0	11	1	1			S4/8	10	1	0	0	0		1	1	2023.11.17	2024.5.14	0	1.64	22	15	41.3	11.8	12.8	5.94	145	125
0001515771	谢元明	男	71岁	2023-10-18	0	0	1	5	0	0			S6/7	10	1	0	0	0		1	1	2023.11.20	2024.9.23	0	4.73	14	10	36.8	16.1	13.7	3.11	135	121
1001255548	钟浩	男	36岁	2023-10-13	0	0	0	3	1	1			S7	11	1	0	0	0		0			2024.11.15	0	2.46	26	22	37.5	11.8	13.3	2.71	136	85
1000720198	马松深	男	40岁	2023-10-11	0	0	0	7	1	0			S6、S5	8、7	2	0	0	0		0			2024.11.15	0	14	21	21	39.4	11.6	14.7	5.61	149	178
1000610393	何学伟	男	68岁	2023-09-28	0	0	0	9	0	0			S5/6	36	1	0	0	0		0			2024.1.22	2	3.89	15	19	37.7	10.7	12.5	6.09	138	212
1001699313	余振鹏	男	65岁	2023-09-28	0	中分化肝细胞性肝癌	0	31	1	1			S5、S5/6	10、39	2	1	0	1	感染、腹腔积液	0			2024.3.28	0	14.86	72	55	36.3	52.3	18.3	6.9	112	96
0003414558	陈华柱	男	72岁	2023-09-26	0	0	3	12	1	1			S8	16	1	0	0	0		0			2024.5.25	0	4.66	18	13	35.6	13	13.4	4.18	161	121
1001427429	姚庚	男	52岁	2023-09-26	0	高级别异型增生结节	0	10	1	1			S6/7	20	1	0	1	0		0			2024.11.6	0	363.6	36	19	34.7	19.3	14.7	5.2	140	124
1001695019	周伦佳	男	62岁	2023-09-20	0	肝细胞高级别异型增生、癌变	0	9	0	0			S6、S8	20	2	1	0	0		0			2024.11.5	0	2.97	36	36	37.7	18	13.4	5.5	147	165
1000307720	李艳	女	61岁	2023-09-18	1	0	2、子宫恶性肿瘤	6	0	0			S3、S4、S8	10	5	0	0	0		1	0	2024.8.8	2024.8.8	2	1.47	21	9	44.8	7.18	12.7	3.7	118	194
0004170941	吴少艺	女	41岁	2023-09-18	0	肝细胞癌TACE术后改变	0	7	0	0			S5	27	1	1	0	0		0			2024.9.23	0	1.46	31	24	38.7	8.5	13.8	3.38	115	172
0000175311	黎志雄	男	55岁	2023-09-15	0	中分化肝细胞癌	0	4	1	1			S8	24	1	1	0	0		0			2024.11.18	0	170	44	19	41.3	45.3	16.3	3.71	100	81
1001668307	黄衍宏	男	47岁	2023-09-15	0	结节性肝硬化伴局灶低级别异型增生	0	5	1	1			S6	10	1	0	0	0		0			出院后未复查	0	8.45	26	13	38	10.6	14.8	4.83	141	113
1001606351	唐新仁	男	46岁	2023-09-08	0	结节性肝硬化（G3S4）伴局灶肝细胞低级别异型增生	0	7	1	1			S7	27	1	1	0	0		0			2024.1.10	0	5.05	26	19	39.6	50	16.3	6.46	120	117
1001659014	陈晓清	女	31岁	2023-08-30	肝腺瘤	不除外肝局灶性结节状增生（FNH）可能	0	8	0	0			S5/7	36	1	0	0	0		0			2023.12.7	2	0.84	16	8	40.1	3.6	13.6	5.82	111	332
0000307266	刘付传华	男	41岁	2023-08-25	0	中分化肝细胞癌	0	14	1	0			S8	28	1	1	0	0		0			2024.9.2	0	5.68	22	25	42.4	13	14.5	6.47	160	150
1001152172	刘万中	男	57岁	2023-08-23	0	0	0	7	1	0			S8	28	1	1	0	0		1	1	2024.10.16	2024.11.13	0	7.52	22	19	39.5	6.1	13.9	4.49	156	223
0003104238	黄秋香	女	70岁	2023-08-23	0	中分化肝细胞癌	1、3	12	1	0			S4/8	29	1	1	0	0		0			2024.8.29	0	4.72	15	8	45.3	12.9	13.1	5.59	132	98
0003850685	李陈	男	66岁	2023-08-16	0	0	0	8	1	1			S8	10	1	0	0	0		0			2024.11.15	0	3.57	37	26	31.9	12	13.6	5.21	136	132
0004170441	李秀荣	女	58岁	2023-08-16	0	结节性肝硬化伴局灶肝细胞低级别异型增生	0	7	1	1			S8	50	1	1	0	0		1	1	2024.3.28	2024.7.28	1	2172.65	38	22	33.2	14	14.4	2.22	105	75
1001002929	陈锡华	男	56岁	2023-08-16	0	低分化肝细胞癌	乳腺恶性肿瘤、1	11	1	1			S6、S5	22	2	1	0	0		1	1	2024.2.23	2024.11.23	0	109	26	12	41.2	10.5	12.8	4.61	124	86
1000953310	谢昭妮	女	39岁	2023-08-12	1	腺癌	肠癌	22	0	0			S8、S5	15、20	2	1	0	0		0			出院后未复查	2	2.13	21	11	41.6	19.1	13.9	3.71	95	314
1001620124	邱春文	男	56岁	2023-08-11	0	高-中分化肝细胞癌	2	16	1	1			S6	26	1	1	0	0		0			2024.10.19	0	6.34	33	34	35.9	5.3	14.1	6.55	138	196
0000026854	方锡洪	男	71岁	2023-08-09	0	0	0	7	1	1			S6（1个）、S5/8（1个）、S8（2个）	31mm、11mm、15mm、10mm	4	1	0	0		0			2024.7.1	0	3.55	28	11	45.8	6.4	13.8	6.37	162	210
1001617467	郑顺生	男	54岁	2023-08-09	0	炎性结节可能性大	1、食管癌	10	0	0			S5	18	1	0	0	0		0			出院后未复查	2	1.64	27	29	38.6	13.6	13	5.51	118	200
1001613711	李政高	女	33岁	2023-08-04	0	中分化肝细胞癌	0	13	1	1			S5、S4	10、20、22	2	1	0	0		0			2024.4.30	0	91.96	28	47	39.2	5.5	13.8	6.35	146	193
0002292648	詹文通	男	41岁	2023-08-04	肝局灶性结节状增生（FNH）改变	肝局灶性结节状增生（FNH）改变	0	19	1	0			S4（2个）、S4/8两个	20、26、15、12	4	0	0	0		0			2023.9.20	0	0.94	19	18	45.6	13.4	16.9	1.94	125	44
1001036681	黄少林	男	61岁	2023-08-03	0	结节性肝硬化伴局灶低级别异型增生	1、肠癌	10	1	1			S6、S5/8	18	2	1	0	0		1	1	2024.4.23	2024.11.28	0	88.06	24	22	35.1	7.6	13.9	4.39	128	89
0000660195	钟子昂	男	76岁	2023-08-02	0	0	0	5	1	1			S4、S7/8	10、34	2	1	0	0		0			2024.10.11	0	333.08	37	36	38.2	25.8	14.5	3.31	135	83
1001589879	梁世雄	男	65岁	2023-08-02	0	肝细胞性肝癌	1、3	10	0	0			S8、S7	16、30	2	1	0	0		0			2023.9.5	0	3.99	38	58	38.5	4	14.6	4.7	120	172
1001614256	张妙清	男	67岁	2023-08-02	0	0	2	8	0	0			S5/6	36	1	1	0	0		1	0	2023.11.26	2023.11.27	0	9.97	17	25	42.5	15.5	13.6	7.12	174	156
1001618424	徐潮生	男	74岁	2023-08-02	0	中分化肝细胞癌	0	7	1	1			S5	20	1	0	0	0		0			2023.9.6	0	10.36	28	20	39.1	25.9	13.9	4.22	138	104
0001845157	姚志东	男	48岁	2023-08-02	0	中分化肝细胞癌	0	7	0	0			S5/6、S8	17、7	2	1	0	0		0			2024.11.22	0	32.72	20	20	42.6	12.2	12.5	6.54	147	237
0004861919	潘杰霞	女	72岁	2023-07-31	0	中分化肝细胞癌	1、乳腺癌、子宫癌	25	0	0			S4/8	20	1	1	0	0		0			2024.1.23	0	1.73	23	21	38	7.1	12.6	5.44	128	245
1001355286	郑明勇	男	70岁	2023-07-28	0	高分化肝细胞癌	0	5	0	0			S4	16	1	0	0	0		0			2024.7.8	0	1.45	21	20	42.2	8.8	13.4	6.84	134	188
0002293679	梁建国	男	43岁	2023-07-28	0	0	0	10	1	1			S5/6	19	1	1	0	0		0			2024.11.13	0	3.42	39	21	37.9	12.3	13.3	3.47	148	98
1001576219	江红珍	女	47岁	2023-07-28	0	中分化肝细胞癌	0	12	1	1			S5/8、S7	26、8	2	1	0	0		0			2024.7.16	0	399.5	42	41	39.4	5.9	13.7	4.97	130	129
1001600113	郭乃壹	男	43岁	2023-07-26	0	高分化肝细胞癌	0	14	1	0			S4/8	26	1	1	0	0		0			2024.9.19	0	17.02	22	24	38.6	4.7	13.8	5.25	113	178
1001570623	刘付瑞青	女	57岁	2023-07-26	0	大部分呈结节性肝硬化改变，部分区域肝细胞增生稍丰富，轻度异型性，倾向不典型增生结节	0	7	1	1			S5/6、S5/6、S3	12、16	2	1	0	0		0			2024.8.5	0	92.43	48	49	36.8	12.7	15.5	3.1	137	73
0004081746	汤振中	男	42岁	2023-07-26	1	0	肠癌	5	0	0			腹壁	44	1	1	0	0		0			2024.12.4	2	1.35	15	15	44	15.5	14.7	4.72	157	158
0003003717	杨胜斌	男	48岁	2023-07-26	0	0	2	13	1	1			S5（2个）	19、12	2	1	0	0		1	1	2024.4.17	2024.4.17	0	3.72	49	52	35.6	21.7	13.4	3.21	153	48
1001595242	谭奎业	男	65岁	2023-07-21	0	中分化肝细胞癌	1、2	9	0	0			S5/6	18	1	1	0	0		0			2024.7.1	0	2.9	21	26	48.6	22.7	13.4	6.25	150	176
1001267439	卢玉如	女	70岁	2023-07-21	0	0	1、2	4	1	1			S8	22	1	1	0	0		0			2023.9.23	0	14.31	36	21	33.6	12.1	13.1	2.31	126	58
1001584776	邱榆翔	男	43岁	2023-07-19	0	中分化肝细胞肝癌	1	11	0	0			S6/7	26	1	1	0	0		0			2024.7.20	0	3.54	33	41	44.8	6.3	12.7	6.48	127	261
1001544111	朱亚妹	女	64岁	2023-07-19	0	高分化肝细胞肝癌	0	15	1	1			S5、S8、S6/7、S7	14mm、12mm、16mm、19mm	4	1	0	0		0			2023.10.25	0	2.97	42	34	35.8	8.2	13.3	6.98	119	130
1000599240	黄又芝	男	70岁	2023-07-14	0	0	1、3	5	0	0			S7	16	1	1	0	0		1	1	2024.5.17	2024.9.20	0	0.69	30	21	40.2	10.6	12.9	4.91	140	93
1000589440	陈海雄	男	44岁	2023-07-14	0	0	0	6	0	0			S6（2个）	10、53	2	1	0	0		1	1	2023.8.17	2021.12.9	0	2.7	21	16	46.5	8.9	12.9	6.99	158	247
1001572939	官桂泉	男	33岁	2023-07-12	0	高分化肝细胞癌	0	10	1	1			S5/6、S7	16、19	2	1	0	0		0			2024.9.30	0	56.07	46	39	37.5	31.9	17.3	2.76	134	75
1001567721	刘运新	男	68岁	2023-07-12	1	肠腺癌肝转移	肠癌、1	21	0	0			S8	26	1	1	0	0		0			出院后未复查	2	2.55	30	33	34.9	4.7	13.6	6.35	90	440
1001547867	李进甲	男	37岁	2023-07-12	0	中分化肝细胞癌。	0	12	1	1			S5/6	34	1	1	0	0		0			2023.12.5	0	6.01	34	16	31	32.4	19.1	4.6	132	80
0004447545	张序达	男	61岁	2023-07-11	0	结节性肝硬化（G2S4)伴局部低级别异型增生结节形成	0	3	1	1			S7	16	1	1	0	0		0			2024.3.2	0	5.02	23	29	42.6	6.5	13	5.04	155	215
1000229477	程琦	女	57岁	2023-07-07	1	腺癌，考虑肠腺癌肝转移可能性大	肠癌、大网膜继发性恶性肿瘤、子宫附件继发性恶性肿瘤	5	0	0			S4/8	25	1	1	0	0		0			2024.1.8	2	3.55	16	9	44.1	13.1	12.3	2.96	140	194
0004687305	夏学军	男	67岁	2023-07-07	0	中分化肝细胞癌	2	17	1	1			S7	28	1	1	0	0		0			2024.11.11	0	7.68	30	35	40.3	12.3	13.6	4.85	134	101
1001569876	黄志杰	男	45岁	2023-07-07	0	中-低分化肝细胞癌	0	7	1	1			S8	28	1	1	0	0		0			2023.10.9	0	7.01	39	30	26.9	13.2	13.8	3	83	83
1001563486	柯大开	男	59岁	2023-07-05	0	中分化肝细胞癌	0	9	1	0			S3	20	1	1	0	0		0			2024.5.20	0	3.47	29	18	41.7	30.9	13.9	5.81	150	100
0003521613	陈国良	男	53岁	2023-07-02	0	0	0	7	1	1			S5、S6、S7	12、19、12	3	0	0	0		0			2024.6.11	0	991	20	14	37.6	26.7	14.1	4.33	111	189
1001001577	刘付森明	男	42岁	2023-06-30	0	中分化肝细胞癌	0	8	1	1			S6	12	1	0	0	0		0			2024.5.30	0	43.29	20	18	34.3	13.9	13.3	6.02	129	86
1000690517	陈润灼	男	67岁	2023-06-30	0	低分化肝细胞癌可能性大	抑郁症	13	0	0			S8	22	1	1	0	0		0			2024.10.12	0	10.07	34	39	49.5	10.5	13.4	5.28	159	262
1001540886	田水德	男	66岁	2023-06-26	0	高级别异型增生、不除外癌变	0	21	1	1			S7、S3	15	2	1	0	0		0			2023.7.12	0	57.3	48	52	32.8	15.2	14.7	3.44	123	67
0003236960	唐汉东	男	82岁	2023-06-23	0	肝细胞高级别异型增生、局部癌变	1	7	1	0			S7/8、S3	18、22	2	1	0	0		0			2024.9.8	0	31.89	20	13	43.6	14	13.4	5.8	144	152
1001538281	马绍兴	男	56岁	2023-06-21	0	中分化肝细胞癌。	0	14	1	1			S6	18	1	1	0	0		0			2023.7.28	0	10.55	71	27	32.3	31.2	16.9	2.79	135	37
1001530767	周玉玲	女	59岁	2023-06-16	0	不典型增生结节	0	12	1	1			S7/8	35	1	1	0	0		0			2024.10.9	0	13.48	149	54	34.5	35.7	15.5	3.21	108	32
1001510795	李明富	男	37岁	2023-06-14	0	低分化肝细胞肝癌	0	21	1	1			S7/8、S7	25、12	2	0	0	0		0			出院后未复查	0	143.7	30	10	44	14.3	16.3	3.06	111	176
1001303155	张运健	男	53岁	2023-06-13	0	高级别异型增生结节，局部不除外癌变为高分化肝细胞癌	0	10	1	1			S5、S7/8	14、20	2	1	0	0		0			2024.9.7	0	6.45	57	35	29.6	8.8	15.6	2.06	137	46
1001512171	张颖琪	女	24岁	2023-06-12	肝局灶性结节状增生（FNH）可能性大	肝局灶性结节状增生（FNH）可能性大	0	4	0	0			S8	49	1	1	0	0		0			2023.7.11	2	1.86	21	16	44.2	10.6	12.6	4.18	101	413
1001442537	冼鸿飞	男	59岁	2023-06-09	0	0	0	12	1	0			S7/8	22	1	1	0	0		0			2024.6.13	0	26.59	27	24	35.1	7.2	13.9	5.42	142	289
1000264268	黄赠招	女	66岁	2023-06-08	0	中分化肝细胞癌	0	5	1	1			S5	43	1	1	0	0		0			出院后未复查	1	1781	26	16	34.7	24.6	15.6	1.45	65	61
1001488380	廖艳萍	女	59岁	2023-06-01	0	0	0	13	1	1			S2/3	>30	1	1	0	0		0			2024.12.3	2	109.5	35	7	30.9	19	17.5	2.79	111	55
1001496823	李若正	男	41岁	2023-05-31	0	中分化肝细胞癌	1、2(肝性脑病)	17	1	1			S5	26	1	1	0	0		0			2023.10.10.	0	4.57	34	29	27.6	17.5	16.2	6.47	84	119
1001511720	刘波	男	51岁	2023-05-31	0	中分化肝细胞癌	0	8	1	0			S6/7	18	1	1	0	0		0			2023.7.10	0	1.49	17	13	41.7	13	12.6	4.21	121	118
0004027903	罗运泉	男	49岁	2023-05-26	0	0	0	5	1	1			S3	16	1	1	0	0		0			2024.8.15	0	478.2	25	21	41.8	18.2	14.9	3.76	143	182
0002541717	郑春霖	男	67岁	2023-05-26	0	0	0	14	1	1			S8、S5、S3	8、9、12	3	1	0	0		0			2024.9.12	1	1.89	32	18	32.4	32.8	16.8	1.72	103	42
0002615490	陈进望	男	48岁	2023-05-24	0	中分化肝细胞癌	0	4	1	0			S7/8	32	1	1	0	0		0			2024.4.28	0	3.64	39	60	38.4	8.1	13.1	6.75	150	259
1001432101	符国	男	58岁	2023-05-23	0	综合治疗术后改变	0	9	0	0			S5	40	1	1	0	0		0			2023.6.28	0	14.21	114	33	32.5	24.6	12.8	5.49	157	127
1000176011	魏炽昌	男	60岁	2023-05-22	1	中分化腺癌，结合免疫组化结果，符合肠中分化腺癌肝转移癌	肠癌、1	8	0	0			S7/8	20	1	1	0	0		0			2024.11.29	2	2.45	22	28	40.7	15.5	12.9	5.08	143	156
1001472879	王小燕	女	31岁	2023-05-19	肝细胞腺瘤	肝细胞腺瘤	0	6	0	0			S6，S7，S8肿块（S8有3枚）。	15mm（S6），57mm（S7），8mm（S8），12mm（S8），15mm（S8）	5	1	0	0		1	1	2023.9.5	2024.5.20	2	2.4	88	154	43.1	13.6	12.3	7.06	149	296
1001496577	李小刚	男	48岁	2023-05-17	0	肝细胞癌，考虑为中分化	2、	4	1	0			S7/8	28	1	1	0	0		0			出院后未复查	0	43.28	82	43	36.2	11.8	13.7	6.87	159	178
0003228593	舒健	男	60岁	2023-05-12	0	0	0	3	1	0			S4	16	1	0	1	0		0			2024.10.8	0	8.08	144	85	38.6	23.9	12.9	6.05	143	101
0001918428	陈映辉	女	71岁	2023-05-10	0	中分化肝细胞癌	1、2	7	0	0			S8	10	1	0	0	0		0			2024.10.15	0	13.1	19	16	44	11.6	13.1	5.47	143	212
1001478618	黄长发	男	47岁	2023-05-10	0	中分化肝细胞肝癌	0	8	1	0			S6	24	1	1	0	0		0			2024.10.16	0	2.72	20	25	46.6	16.7	12.8	5.77	164	92
1001443456	唐玉香	女	72岁	2023-05-04	0	高-中分化肝细胞癌	1	16	1	1			S2/4	44	1	1	0	0		0			2024.10.14	0	431.1	33	30	32.1	22.1	16.3	2.05	116	58
0004766788	莫李文	男	37岁	2023-04-27	0	0	0	8	0	0			S8、S7/8	15、14	2	1	0	0		0			2024.9.27	0	754.3	27	38	40.4	4.1	12.7	4.72	163	211
1001423331	李仕劲	男	30岁	2023-04-27	0	0	0	3	1	1			S5、S5/8	15、10、15	3	1	0	0		1	1	2023.6.29	2024.2.23	0	527.6	45	35	47.6	8.6	14	3.86	151	235
0000094707	徐灿强	男	52岁	2023-04-26	0	0	0	7	1	1			S8	22	1	1	0	0		0			2024.9.30	0	154.63	27	28	41.3	20.2	13.5	6.63	161	234
1001453116	龚建平	男	55岁	2023-04-26	0	酒精性脂肪性肝病（S1A2F4）伴灶性肝细胞小细胞变	1、2	8	1	1			S4、S5	22	2	1	0	0		0			2024.8.24	0	5.51	40	24	33.7	37.1	15.7	3.95	138	119
1000377247	雷刚	男	53岁	2023-04-25	0	0	0	5	1	1			S7/8	18	1	1	0	0		0			2024.10.10	0	2.39	113	50	37.8	27.6	16	3.38	127	47
0001507948	黎壮营	男	69岁	2023-04-24	0	0	1、2	8	1	1			S6、S6/7	13、44	2	1	0	0		1	1	2023.6.13	2024.8.24	0	20.13	24	22	35.8	5.4	13.2	5.55	152	92
1001380739	李健飞	男	59岁	2023-04-22	0	未见确切可观察的存活肿瘤，周围肝组织呈结节性肝硬化（G2S4）改变	1、2	9	1	1			S7/8	40	1	1	0	0		0			2024.11.29	0	9.69	19	16	32.4	16.5	13.5	2.25	117	97
0001868704	黄振英	女	48岁	2023-04-20	0	0	0	15	1	0			S5	12	1	0	0	0		1	1	2024.4.23	2024.11.23	0	3.18	17	22	39.1	9.6	12.2	4.04	137	151
0000352825	冯悦	女	73岁	2023-04-18	0	中分化肝细胞癌	肝性脑病	20	1	1			S7/8	44	1	1	0	0		0			2024.5.21	1	121.4	30	17	29.8	31.1	20.1	5.71	86	92
1001399104	吴志锋	男	44岁	2023-03-29	0	高分化肝细胞癌	0	9	1	1			S6	19	1	1	0	0		0			2024.11.20	0	10.9	51	91	44.6	9.2	13.4	8.86	155	211
1001382460	林豪琼	男	57岁	2023-03-22	0	异型增生结节	2	17	1	0			S7（2个）、S2	23、10、15	3	0	1	0		1	1	2023.10.27	2024.9.27	0	7.6	25	27	40.9	10.6	13.6	7.42	146	251
1001373821	黄劲雄	男	51岁	2023-03-22	0	中分化肝细胞癌	0	17	1	0			S6、S5/8	16、10	2	1	0	0		0			2024.7.29	0	14.83	32	4	45	5.8	13.2	5.77	163	175
1001388986	赖秀真	女	71岁	2023-03-22	0	中分化肝细胞癌	陈旧性肺结核	7	1	1			S2/3	22	1	1	0	0		0			2024.2.29	0	586.02	42	24	34.8	11.2	14.8	2.4	100	82
0002991895	陈显明	男	63岁	2023-03-21	0	高分化肝细胞癌	0	7	1	1			S2	32	1	1	0	0		1	1	2024.11.6	2024.12.6	0	4.56	34	25	29.3	26.1	17.5	2.69	139	67
1000855489	郑银锋	男	36岁	2023-03-21	0	0	0	6	1	1			S8、S7（2个）	10、10、32	3	1	0	0		1	1	2023.5.14	2024.9.26	0	55.2	73	84	42	12.2	13.3	4.58	171	127
0003787464	邹华明	男	65岁	2023-03-17	0	0	2	6	1	1			S7	16	1	0	1	0		0			2024.7.10	0	149.69	35	40	42	7.1	13.8	3.74	100	83
1001039634	袁锦笑	女	65岁	2023-03-15	0	肝细胞异型增生、癌变	地中海贫血	11	1	1			S8	16	1	0	0	0		0			2024.4.18	0	106.2	28	18	39	28.9	15.2	2.08	78	84
1001357629	杨富高	男	66岁	2023-03-08	0	高-中分化肝细胞肝癌	1	6	0	0			S5/6	33	1	1	0	0		0			2024.9.25	2	2.52	17	29	44.5	8.6	12.2	8.25	155	246
1001027979	陶坤宇	男	32岁	2023-03-03	0	0	0	2	1	1			S7	15	1	1	0	0		1	1	2023.8.29	2024.12.10	0	27.43	37	33	43.1	11.6	14.3	3.67	133	127
1000999683	陈杰	男	54岁	2023-03-03	0	中分化肝细胞癌	1	6	0	0			S5、S6（2个）	12、10、10	3	1	0	0		1	1	2023.9.5	2024.8.29	0	2.44	25	30	39.5	13.3	12.7	5.02	140	164
1001347619	董天胜	男	68岁	2023-03-01	0	中分化肝细胞癌	1	6	1	0			S5/8、S5/6	19	2	1	0	0		0			2024.12.3	0	9.02	40	29	38.4	4.8	12.6	5.3	134	245
1001324884	王云华	男	79岁	2023-02-03	0	中分化肝细胞癌伴灶性坏死	0	6	1	1			S5	29	1	1	0	0		0			2023.3.24	0	19.7	23	16	37.6	14.3	13.3	8.09	127	118
